# Supplementary material for: An efficient particulate photocatalyst for overall water splitting based on scandium and magnesium co-doped strontium titanate
Source: Royal Society of Chemistry journal article supplement (doi:10.1039/d3se01408h), 2023-11-29
Supplement: d3se01408h1.pdf [file d3se01408h1.pdf]

## Supporting Information

### **An Efficient Particulate Photocatalyst for Overall Water Splitting Based on Scandium and Magnesium Co-Doped Strontium Titanate**

Shigeru Ikeda,<sup>\*a,b</sup> Riku Okamoto,<sup>a</sup> Akira Kimura,<sup>a</sup> Yuhi Nakayasu,<sup>c</sup> Akira Yamakata,<sup>c</sup>  
Ryota Tomizawa,<sup>d</sup> Taizo Masuda,<sup>d</sup> Koichiro Nakatani<sup>d</sup>

<sup>a</sup> Department of Chemistry, Konan University, 9-1 Okamoto, Higashinada-ku, Kobe, Hyogo 658-8501, Japan.

<sup>b</sup> Institute for Energy Conversion Materials, Konan University, 9-1 Okamoto, Higashinada-ku, Kobe, Hyogo 658-8501, Japan.

<sup>c</sup> Graduate School of Natural Science & Technology, Okayama University, 3-1-1 Tsushima-naka, Kita-ku, Okayama 700-8530 Japan.

<sup>d</sup> Carbon Neutral Development Division, Toyota Motor Corporation, 1200 Mishuku, Susono, Shizuoka 410-1193, Japan.

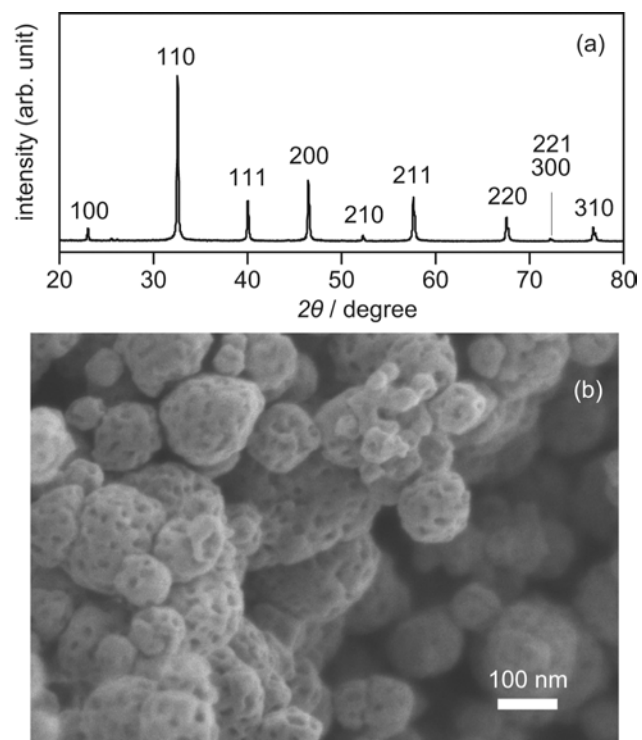

**Fig. S1** (a) an XRD pattern and an SEM image of the commercial SrTiO<sub>3</sub> powder supplied from FUJIFILM Wako.

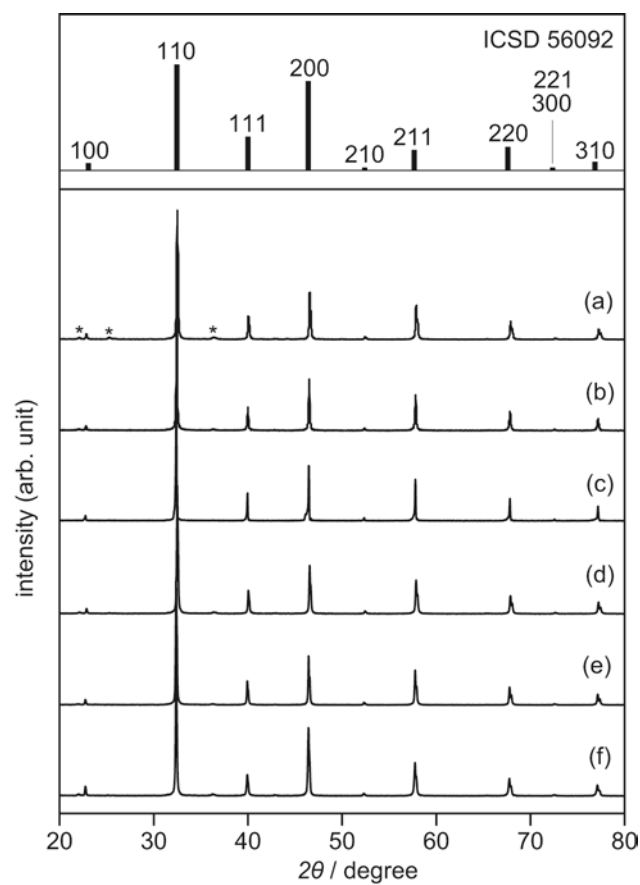

**Fig. S2** XRD patterns of (a) SrTiO<sub>3</sub>:Al, (b) SrTiO<sub>3</sub>:Sc, (c) SrTiO<sub>3</sub>:Mg, (d) SrTiO<sub>3</sub>:Al,Sc, (e) SrTiO<sub>3</sub>:Al,Mg, and (f) SrTiO<sub>3</sub>:Sc,Mg samples. An XRD profile of SrTiO<sub>3</sub> (ICSD 56092) obtained by VESTA software<sup>1</sup> was also shown as a reference. Asterisks (\*) denote reflections of SrCO<sub>3</sub> derived from the SrCl<sub>2</sub> flux.

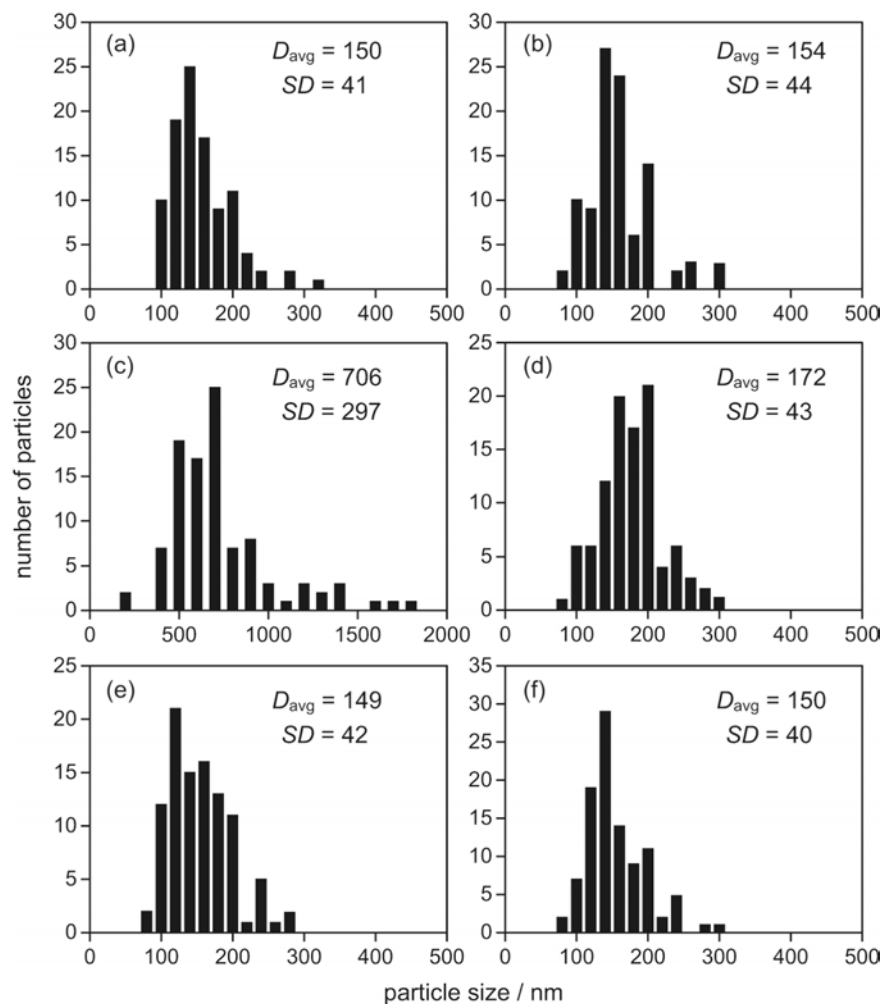

**Fig. S3** Particle-size distributions of (a) SrTiO<sub>3</sub>:Al, (b) SrTiO<sub>3</sub>:Sc, (c) SrTiO<sub>3</sub>:Mg, (d) SrTiO<sub>3</sub>:Al,Sc, (e) SrTiO<sub>3</sub>:Al,Mg, and (f) SrTiO<sub>3</sub>:Sc,Mg samples. Insets of these plots indicate average diameters ( $D_{avg}$ s) and their standard deviations ( $SD$ s) in a nanometer unit.

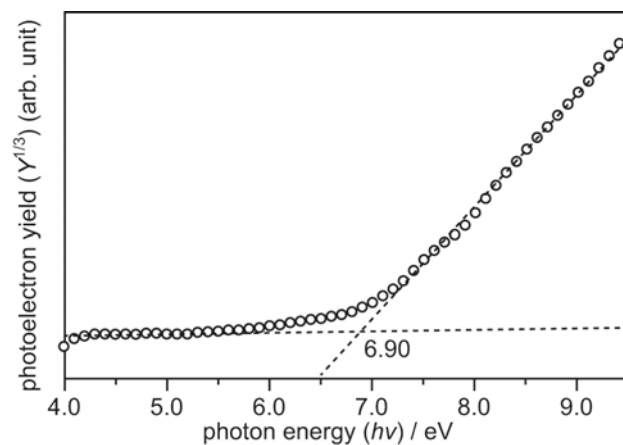

**Fig. S4** A photoemission yield ( $Y^{1/3}$ )-energy ( $h\nu$ ) plot of the  $\text{SrTiO}_3\text{:Sc,Mg}$  sample.

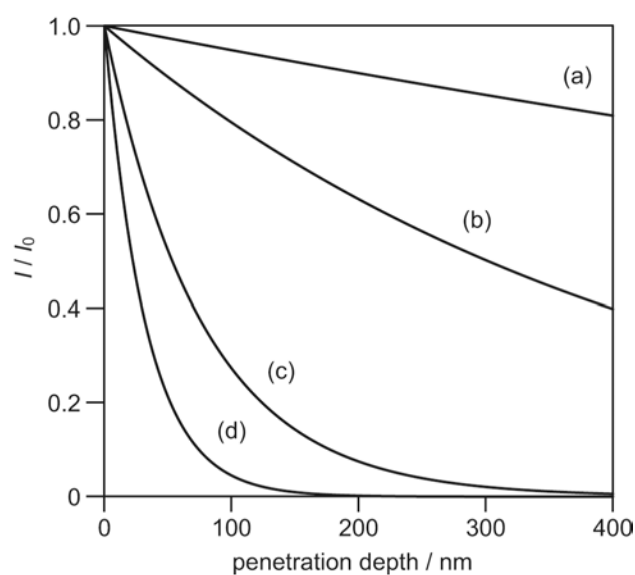

**Fig. S5** Transmittance depth profiles of an  $\text{SrTiO}_3$  bulk crystal at various photon energies obtained from photoabsorption coefficients ( $\alpha$ ) reported by Zollner et al.<sup>2</sup> (a) 3.2 eV (365 nm), (b) 3.4 eV (344 nm), (c) 3.8 eV (326 nm), and (d) 4.0 eV (310 nm).

**Table S1** Ratios of intensities of the photoabsorption at 10,000 cm<sup>-1</sup> measured in O<sub>2</sub> and H<sub>2</sub>O after a 100-μs delay relative to that measured in N<sub>2</sub>

| Sample                    | $I_{O_2}/I_{N_2}^{a)}$ | $I_{O_2}/I_{H_2O}^{b)}$ |
|---------------------------|------------------------|-------------------------|
| SrTiO <sub>3</sub> :Sc,Mg | 0.76                   | 1.76                    |
| SrTiO <sub>3</sub> :Al    | 0.81                   | 1.36                    |

<sup>a)</sup> Ratio of the photoabsorption intensity at 10,000 cm<sup>-1</sup> measured in O<sub>2</sub> after the 100 μs delay relative to that measured in N<sub>2</sub>.

<sup>b)</sup> Ratio of the photoabsorption intensity at 10,000 cm<sup>-1</sup> measured in H<sub>2</sub>O after the 100 μs delay relative to that measured in N<sub>2</sub>.

## References

- 1 K. Momma, F. Izumi, *J. Appl. Crystallogr.* 2011, **44**, 1272.
- 2 S. Zollner, A. A. Demkov, R. Liu, P. L. Fejes, R. B. Gregory, P. Alluri, *J. Vac. Sci. Technol. B* 2000, **18**, 2242.
